# Supplementary material for: Translatome and Transcriptome Profiling of Hypoxic-Induced Rat Cardiomyocytes
Source: PubMed Central journal article supplement — Mol Ther Nucleic Acids. 2020 Oct 22;22:1016–24. doi: 10.1016/j.omtn.2020.10.019 (PMC7689039; doi:10.1016/j.omtn.2020.10.019), 2020-10-22
Supplement: mmc1.pdf [file mmc1.pdf]

**OMTN, Volume 22**

**Supplemental Information**

**Translatome and Transcriptome Profiling  
of Hypoxic-Induced Rat Cardiomyocytes**

**Zhijie Shen, Lixiong Zeng, and Zhihui Zhang**

**Table S1. All the primers and nucleotides used in this study are listed.**

| Gene name              | Primer sequences                                                       |
|------------------------|------------------------------------------------------------------------|
| BNIP3 for RNA          | 5'-CAAGATACCAACAGAGCTGAAAT-3'<br>5'-GGAAGGAAAACCTTCAGAAAG-3'           |
| BNIP3 for RIP          | 5'-TGTCCCCTCAATCCCGTGTGCGCCTGGCCT-3'<br>5'-CTGCCGCCTCCGCGGCCCTCTCGG-3' |
| ADRB2 for RNA          | 5'-GGGCCTAGCGGTGGTGCCTTTTGGGG-3'<br>5'-TACCAGTGCATCTGGATAGGC-3'        |
| ADRB2 for RIP          | 5'-CGCGTTCAGGCTGCAGCTGGCAGGC-3'<br>5'-CGGCTTTCAGTGCCAGACGCTCT-3'       |
| NCBP3 for RNA          | 5'-TGAGATTTGCTACGAAAGATGACA-3'<br>5'-CACCACGACTCTGTCATCAGCATCCA-3'     |
| EWSR1 for RNA          | 5'-GCACTGGGGCTTATGACACCACCTGCT-3'<br>5'-TGCATCGGGTAGCTCCCAGGA-3'       |
| DRG2 for RNA           | 5'-CTCTGTGGGTAAGTCCACTTTCTTGA-3'<br>5'-CTCCAGCAGGGACCTCTGCACA-3'       |
| GAPDH                  | 5'-AGGCTGAGAATGGGAAGCTGGTCATCA-3'<br>5'-TAAGCAGTTGGTGGTGCAGGATGCAT-3'  |
| Random RNA fragment    | 5'-<br>CUCUCUACGGAGGAAUACUAGAGGGCUUUCUACUUCUACUUCUACUCAC-3'            |
| Motif deleted fragment | 5'-<br>CUCUCUACGGAGGAAUACUAGAGUUCUACUUCUACUCACUUCUACUCAC-3'            |
| Fragment_1             | 5'-<br>CUCUCUACGGAGGAAUACUAGAAGCUGCCCUACUUCUACUUCUACUCAC-3'            |
| Fragment_2             | 5'-<br>CUCUCUACGGAGGAAUACUAGAAGCUUCCCUACUUCUACUUCUACUCAC-3'            |
| Fragment_3             | 5'-<br>CUCUCUACGGAGGAAUACUAGAAGAUUCCCUACUUCUACUUCUACUCAC-3'            |
| Fragment_4             | 5'-<br>CUCUCUACGGAGGAAUACUAGAAGCUUCACUACUUCUACUUCUACUCAC-3'            |

**Table S2. The summary of all sequencing raw data in this study.**

**Table S3. The expression of the differential expressed genes among NC, MH and SH in RNA-seq.**

**Table S4. The expression of the differential expressed genes among NC, MH and SH in polyribo-seq.**

**Figure S1. The hypoxic-induced effects of different periods on arterial SaO<sub>2</sub> (A), and the activities of SOD (B) and MDA (C) in sera in each group. Data is presented as the mean  $\pm$  SEM ( $n = 4$  per group). “\*” the first and “^” the last significant difference ( $p < 0.05$ ) compared with the previous group. SaO<sub>2</sub>: oxygen saturation; SOD: superoxide dismutase; MDA: malonaldehyde; NC: normoxia control.**

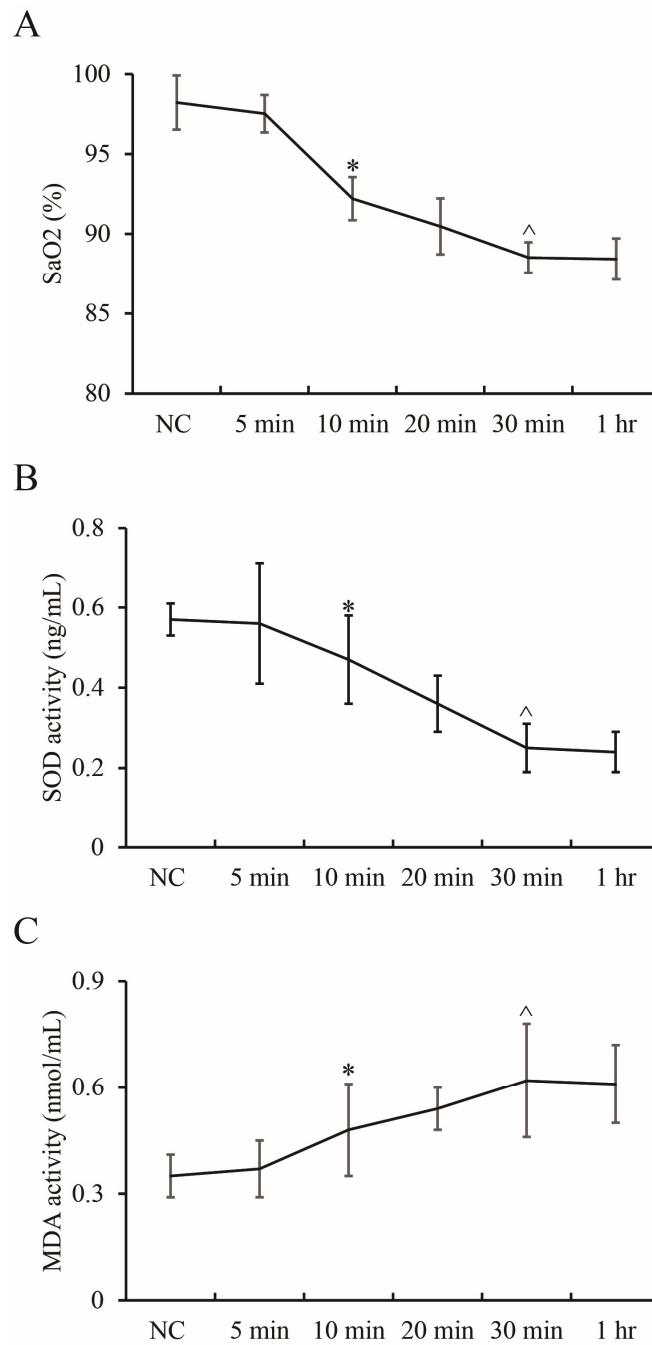

**Figure S2. Validation of TTC (A) and masson (B) staining with 200X magnification in hypoxic-induced effects of left ventricular myocardial tissues. \*  $p < 0.05$  vs. NC group. NC: normoxia control; MH: mild hypoxia; SH: severe hypoxia.**

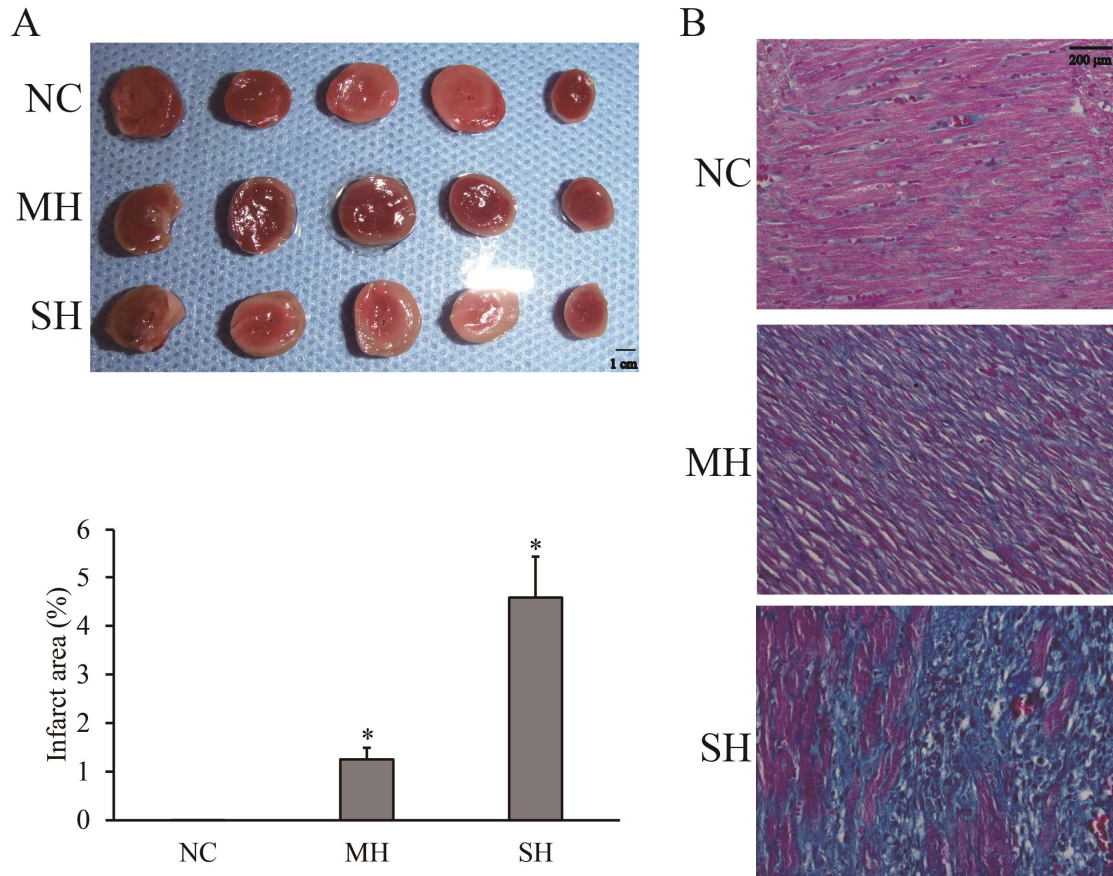

**Figure S3. WB assay of HIF-1 $\alpha$ , VEGFA, GLUT1 and LDHA in H9C2 cells exposed to hypoxia.** NC group. NC: normoxia control; MH: mild hypoxia; SH: severe hypoxia.

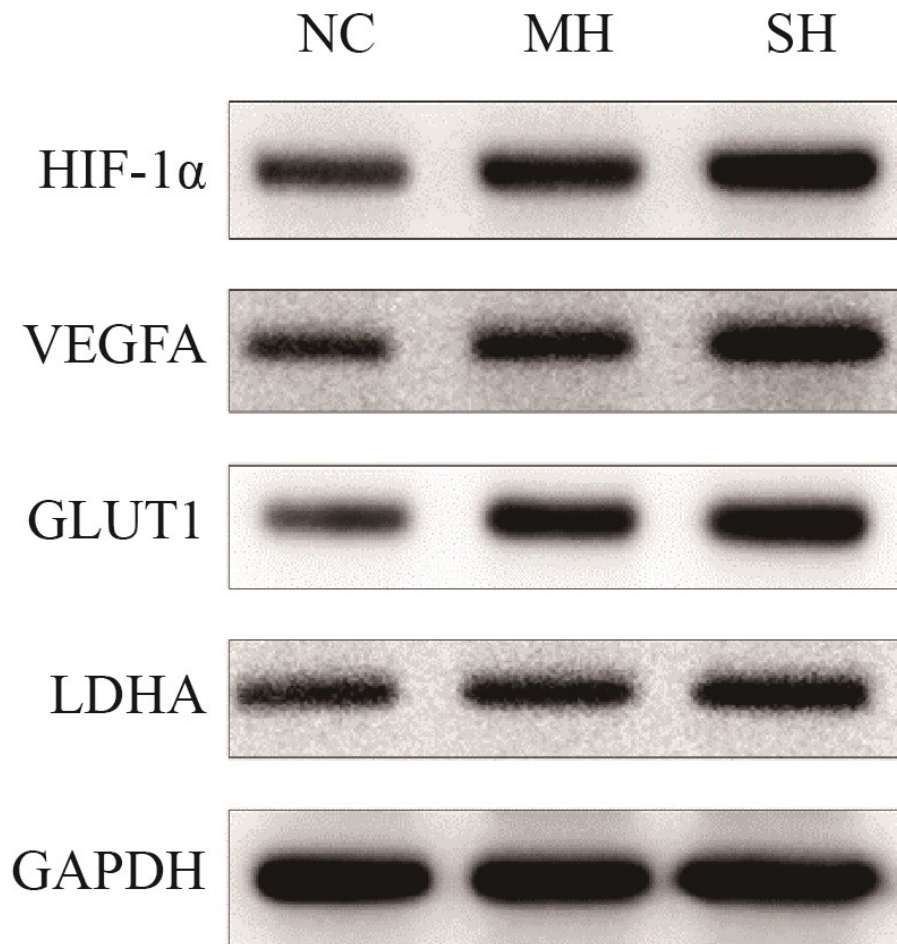

**Figure S4. The Correlation analysis of the biological replications of each sequencing sample.**

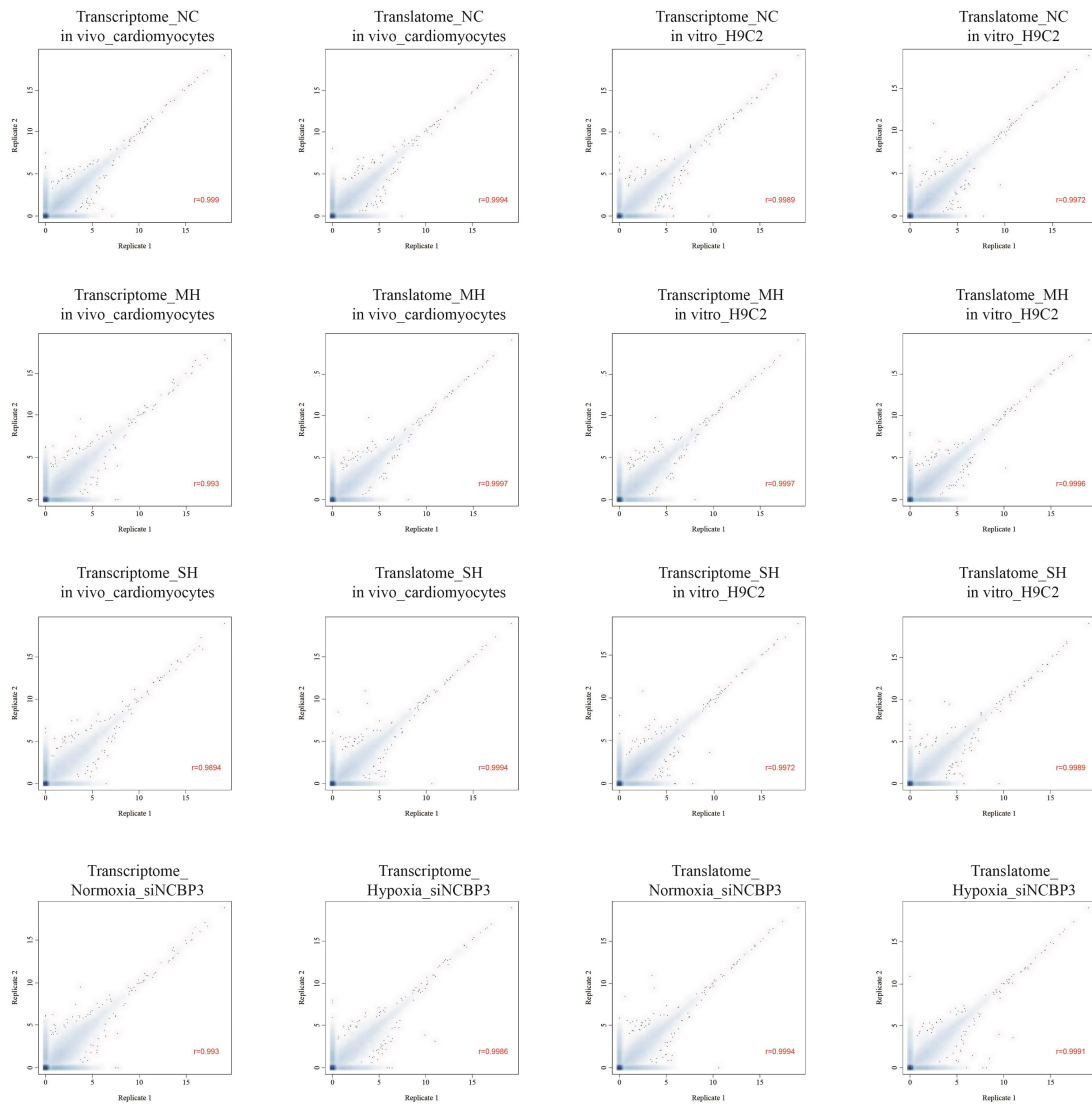

**Figure S5. The alignment view of wild type and mutant 5'UTR of BNIP3 (A) and ADRB2 (B). The differences between wild type (top) and mutant (below) sequences are indicated by red frame.**

### A

| Score         | Expect                                                        | Identities   | Gaps      | Strand    |
|---------------|---------------------------------------------------------------|--------------|-----------|-----------|
| 187 bits(101) | 4e-53                                                         | 116/123(94%) | 2/123(1%) | Plus/Plus |
| Query 1       | TGTCCCCTCAATCCCGTGTGCGCTGGCCTCAGAGCTGAGCGGGCGCA-AGCTGCC-CTGCT | 58           |           |           |
| Sbjct 1       | TGTCCCCTCAATCCCGTGTGCGCTGGCCTCAGAGCTGAGCGGGCGCCAGGACCATCTGCT  | 60           |           |           |
| Query 59      | ACCTCTCAGTGGTCACTTCCCAGGCCGTGTCGCAGTTGGGCTCCGGCTCCTTTGCGGAGCC | 118          |           |           |
| Sbjct 61      | ACCTCTCAGTGGTCACTTCCCAGGCCGTGTCGCAGTTGGGCTCCGGCTCCTTTGCGGAGCC | 120          |           |           |
| Query 119     | ACC 121                                                       |              |           |           |
| Sbjct 121     | ACC 123                                                       |              |           |           |

### B

| Score         | Expect                                                         | Identities   | Gaps      | Strand    |
|---------------|----------------------------------------------------------------|--------------|-----------|-----------|
| 329 bits(178) | 2e-95                                                          | 193/200(97%) | 1/200(0%) | Plus/Plus |
| Query 1       | C CGGTT CAGGCTGCAGCTGGCAGGCATCGCGAGCCCGGAGCACCCACGAGCTCAGTGTGC | 60           |           |           |
| Sbjct 1       | C CGGTT CAGGCTGCAGCTGGCAGGCATCGCGAGCCCGGAGCACCCACGAGCTCAGTGTGC | 60           |           |           |
| Query 61      | AGGACGCGCCCCAGCACAGCCACCTACGGTCTCTGAATGAAGCTTC-CAGGAGTCCGCC    | 119          |           |           |
| Sbjct 61      | AGGACGCGCCCCAGCACAGCCACCTACGGTCTCTGAATGTTGAGACGAAGGAGTCCGCC    | 120          |           |           |
| Query 120     | CCCGACGGCTGCGCCCATCGGAGGTGCACCCGCTGAGAGCGTCTGGGCACTGAAAGCC     | 179          |           |           |
| Sbjct 121     | CCCGACGGCTGCGCCCATCGGAGGTGCACCCGCTGAGAGCGTCTGGGCACTGAAAGCC     | 180          |           |           |
| Query 180     | GGTGGCTCACCTGCCGGCC 199                                        |              |           |           |
| Sbjct 181     | GGTGGCTCACCTGCCGGCC 200                                        |              |           |           |
